# Supplementary material
Source: PubMed Central journal article supplement (PMC4400537)
Supplement: supp_eru282_jexbot116814_file001.pdf [file supp_eru282_jexbot116814_file001.pdf]

# Volkert et al. Supplementary Figure S1

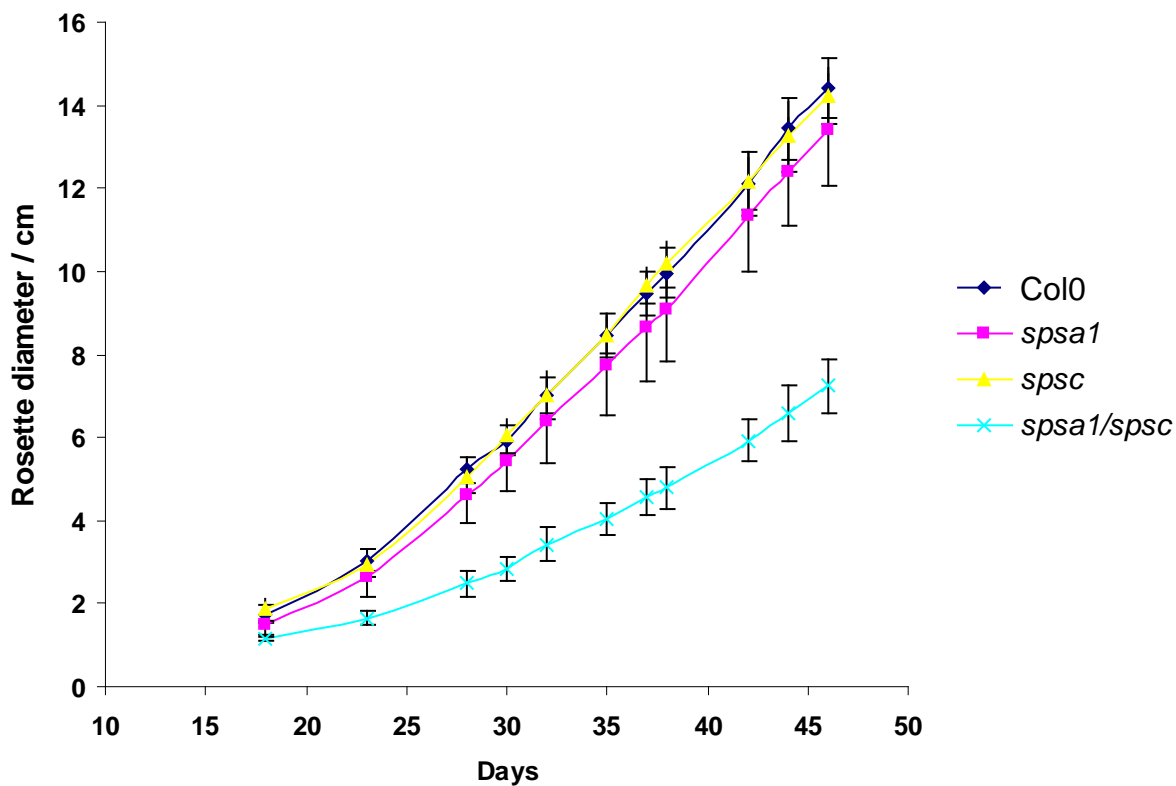

**Supplementary Figure S1.** Rosette diameter as a proxy for plant growth on soil under short day (8h light/ 16h dark) conditions. Each value is the mean  $\pm$  SD of at least three measurements.

# Volkert et al. Supplementary Figure S2

**A**

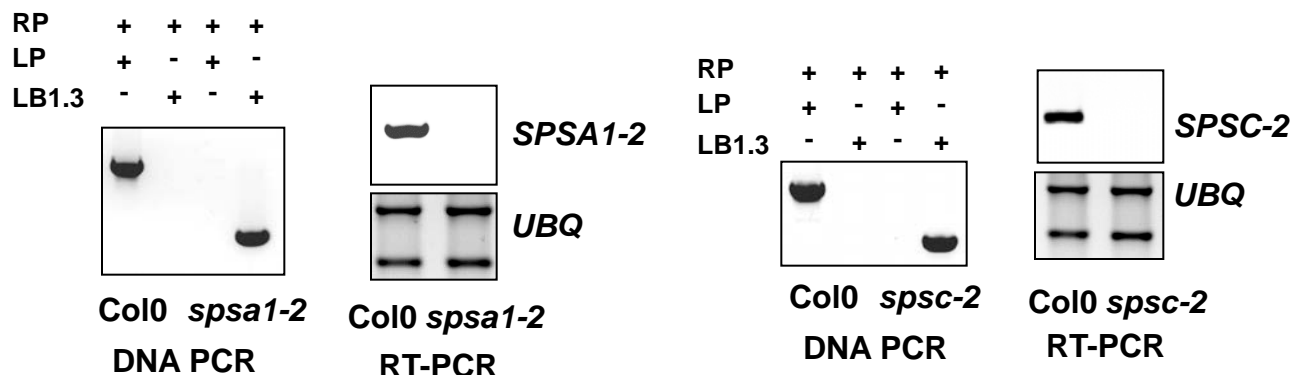

**B**

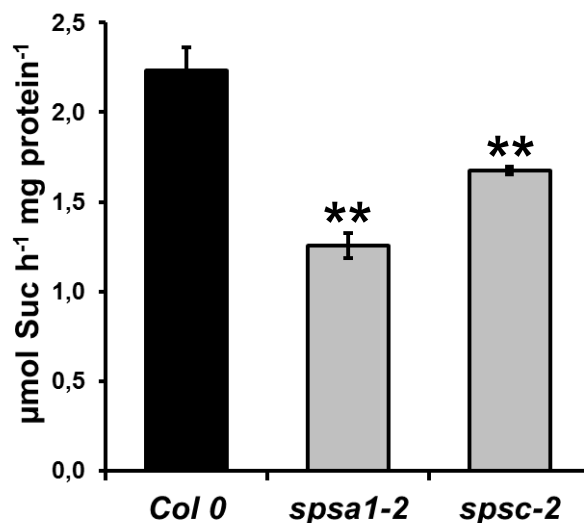

**Supplementary Figure S2:** Analysis of an independent set of SPS T-DNA insertion lines. A, genotyping (DNA PCR) and expression (RT-PCR) analysis of *SPSA1* and *SPSC* expression in the respective mutant background as compared to the wild type control (Col 0). *UBQ* serves as an internal control. D, SPS enzyme activity in *spsa1-2* and *spsc-2* knock-out lines as compared to the wild type control. The values represent the mean of at least 4 independent biological replicates  $\pm$  SD. \*\* indicates a significant difference to the control at  $P < 0,001$  according to students *t* test.

| <b>Supplemental Table 1: Primers used in this study.</b>                                    |    |                                      |
|---------------------------------------------------------------------------------------------|----|--------------------------------------|
| Nucleotide sequence of gene-specific primers for protein expression in <i>S. cerevisiae</i> |    |                                      |
| AtSPSA1                                                                                     | Fw | 5'-CACCATGGCCGGGAACGATTGGG-3'        |
|                                                                                             | Rv | 5'-TCAGTCCTTGAGAAGCTCTAATTTC-3'      |
| AtSPSA2                                                                                     | Fw | 5'-CACCATGGTGGGAAACGACTGGGTGAATAG-3' |
|                                                                                             | Rv | 5'-TCAAGGCTTGAGGAGACTGATCCCAAG-3'    |
| AtSPSB                                                                                      | Fw | 5'-CACCATGGCCGGGGAACGAGTGG-3'        |
|                                                                                             | Rv | 5'-TCAAGCAGTGGCTTTTCGAGAGCTG-3'      |
| AtSPSC                                                                                      | Fw | 5'-CACCATGGCAAGAAATGATTGGAT-3'       |
|                                                                                             | Rv | 5'-TACTTGATCCCATAGGCCTCT-3'          |
| Nucleotide sequence of gene-specific primers for construction of promoter-GUS constructs    |    |                                      |
| AtSPSA1                                                                                     | Fw | 5'-ATCGATAAGATTGTTCTGTTGGTG-3'       |
|                                                                                             | Rv | 5'-GAATTCCTGGTGGGACGATCAAAG-3'       |
| AtSPSA2                                                                                     | Fw | 5'-ATCGATCACTAATACTAACGAATG-3'       |
|                                                                                             | Rv | 5'-GAATTCCTGGTGGTTCGCTCTCCCGAAC-3'   |
| AtSPSB                                                                                      | Fw | 5'-ATCGATGAAGCCAATCTTAGTAAATG-3'     |
|                                                                                             | Rv | 5'-GAATTCCTCTGAGTTTGCCTCTGTTTC-3'    |
| AtSPSC                                                                                      | Fw | 5'-ATCGATCTTGTGTAGTAATGCATTC-3'      |
|                                                                                             | Rv | 5'-GAATTCCTCTCTGATTGTTGCACTG-3'      |
| Nucleotide sequence of gene-specific primers for used to confirm T-DNA insertions           |    |                                      |
| SALK_148643_LP                                                                              |    | 5'-TTCTAATAATGTTGCGCCTGG-3'          |
| SALK_148643_RP                                                                              |    | 5'-CACCGGGTATGTGTTTTTACG-3'          |
| SALK_099817_LP                                                                              |    | 5'-CTCTCAAAGGAGATCACGTCG-3'          |
| SALK_099817_RP                                                                              |    | 5'-AGCTCCATGGATAGGAAGAGC-3'          |
| SALK_037958_LP                                                                              |    | 5'-GTAGTTACGGCAGTGCTCTGG-3'          |
| SALK_037958_RP                                                                              |    | 5'-GTGAATGTCAGCCTCTTCGAG-3'          |
| SALK_020179_LP                                                                              |    | 5'-AATGCCACAAAGACAGGTCAG-3'          |
| SALK_020179_RP                                                                              |    | 5'-TTTTCAATATGCTCGTGGGAC-3'          |
| LBb3.1                                                                                      |    | 5'-ATTTTGCCGATTTTCGGAAC-3'           |
| AtSPSA1                                                                                     | Fw | 5'-CGAGCAGATTGTCCTTGTCT-3'           |
|                                                                                             | Rv | 5'-AAAGGAGATCACGTCCGGTGAAG-3'        |
| AtSPSA2                                                                                     | Fw | 5'-ACTCTACTTCACGTCCTCTGG-3'          |
|                                                                                             | Rv | 5'-CGGGTTGCTCACGCAAGTC-3'            |
| AtSPSB                                                                                      | Fw | 5'-GATCAGGCATCTAGCAATTCCC-3'         |
|                                                                                             | Rv | 5'-TCAGAACCCAATGTGACGAGC-3'          |
| AtSPSC                                                                                      | Fw | 5'-CTACCTATCCCATGTCGAACAT-3'         |
|                                                                                             | Rv | 5'-GCCTAAGGTCATCGACTCTTC-3'          |
| UBQ                                                                                         | Fw | 5'-ATGCAGATYTTTGTGAAGAC-3'           |
|                                                                                             | Rv | 5'-ACCACCACGRAGACGGAG-3'             |
| Nucleotide sequence of gene-specific primers used for qPCR                                  |    |                                      |
| AtSPSA1                                                                                     | Fw | 5'-GCAGCGGTACCTCCAGTAAG-3'           |
|                                                                                             | Rv | 5'-CACCGGACGAACAAATACCT              |
| AtSPSA2                                                                                     | Fw | 5'-AGTGAAAGATCCCGCTTTGA-3'           |
|                                                                                             | Rv | 5'-ACCTAAGGGCCTGAGATCGT-3'           |
| AtSPSB                                                                                      | Fw | 5'-ACGAGAATGCAGATCGTTCC-3'           |
|                                                                                             | Rv | 5'-CGGAGAAGAGCATCAGAACC-3'           |
| AtSPSC                                                                                      | Fw | 5'-CGGAGAAGAGCATCAGAACC-3'           |
|                                                                                             | Rv | 5'-AATGGGCAGACCATAAGCAG-3'           |
| 18S rRNA At                                                                                 | Fw | 5'-AAACCCCGACTTATGGAAGG-3'           |
|                                                                                             | Rv | 5'-CGAACCTAATTCTCCGTCA-3'            |
